# Supplementary material for: Red persistent and photostimulable phosphor SrLiAl3N4:Eu2+
Source: Royal Society of Chemistry journal article supplement (doi:10.1039/d0tc00277a), 2020-01-01
Supplement: d0tc00277a1.pdf [file d0tc00277a1.pdf]

## SUPPORTING INFORMATION

### Red persistent and photostimulable phosphor SrLiAl<sub>3</sub>N<sub>4</sub>: Eu<sup>2+</sup>

Shiyou Zhang, Zhen Song, Shuxin Wang, Zhizhen Wang,  
Feixiong Wang, Quanlin Liu\*

The Beijing Municipal Key Laboratory of New Energy Materials and Technologies,  
School of Materials Science & Engineering, University of Science and Technology  
Beijing, Beijing 100083, China.

\* Corresponding Author: E-mail address: ql Liu@ustb.edu.cn (Quanlin Liu)

**Table S1.** Main parameters of processing and refinement of the SrLiAl<sub>3</sub>N<sub>4</sub> (SLAN) samples.

| Compound                   | SrLiAl <sub>3</sub> N <sub>4</sub> |
|----------------------------|------------------------------------|
| Space Group                | <i>P</i> -3 <i>m</i> 1             |
| <i>a</i> , Å               | 5.855 (1)                          |
| <i>b</i> , Å               | 7.483 (4)                          |
| <i>c</i> , Å               | 9.932 (2)                          |
| <i>α</i> , Å               | 83.61 (9)                          |
| <i>β</i> , Å               | 76.76 (7)                          |
| <i>γ</i> , Å               | 79.54 (9)                          |
| <i>V</i> , Å <sup>3</sup>  | 415.50 (1)                         |
| <i>R<sub>p</sub></i> , %   | 14.0                               |
| <i>R<sub>wp</sub></i> , %  | 14.1                               |
| <i>R<sub>exp</sub></i> , % | 8.59                               |
| <i>χ</i> <sup>2</sup>      | 1.64                               |

**Table S2.** Fractional atomic coordinates and isotropic displacement parameters (Å<sup>2</sup>) of SLAN.

| Atom | <i>x</i>  | <i>y</i>  | <i>z</i>  | <i>B</i> <sub>iso</sub> | Occ. |
|------|-----------|-----------|-----------|-------------------------|------|
| Sr1  | 0.001 (7) | 0.131 (7) | 0.124 (3) | 0.114 (6)               | 1    |
| Sr2  | 0.020 (4) | 0.382 (5) | 0.375 (1) | 0.077 (9)               | 1    |
| Al1  | 0.537 (1) | 0.955 (3) | 0.127 (8) | 0.299 (5)               | 1    |
| Al2  | 0.172 (1) | 0.957 (5) | 0.388 (8) | 0.000 (0)               | 1    |
| Al3  | 0.169 (8) | 0.703 (4) | 0.155 (2) | 0.000 (0)               | 1    |

|     |           |           |           |           |   |
|-----|-----------|-----------|-----------|-----------|---|
| Al4 | 0.814 (8) | 0.563 (0) | 0.107 (7) | 0.713 (2) | 1 |
| Al5 | 0.468 (8) | 0.564 (8) | 0.373 (5) | 0.681 (5) | 1 |
| Al6 | 0.571 (2) | 0.190 (4) | 0.362 (6) | 0.000 (0) | 1 |
| N1  | 0.374 (7) | 0.854 (7) | 0.005 (3) | 0.000 (0) | 1 |
| N2  | 0.388 (5) | 0.357 (2) | 0.512 (9) | 0.000 (0) | 1 |
| N3  | 0.372 (4) | 0.111 (4) | 0.276 (3) | 0.943 (7) | 1 |
| N4  | 0.156 (9) | 0.939 (9) | 0.597 (0) | 0.000 (0) | 1 |
| N5  | 0.843 (2) | 0.775 (3) | 0.160 (5) | 0.252 (2) | 1 |
| N6  | 0.240 (2) | 0.459 (2) | 0.089 (0) | 0.000 (0) | 1 |
| N7  | 0.203 (1) | 0.705 (6) | 0.349 (7) | 0.000 (0) | 1 |
| N8  | 0.671 (4) | 0.386 (9) | 0.246 (2) | 0.000 (0) | 1 |
| Li1 | 0.482 (8) | 0.282 (6) | 0.147 (6) | 0.000 (0) | 1 |
| Li2 | 0.223 (2) | 0.180 (8) | 0.656 (7) | 0.000 (0) | 1 |

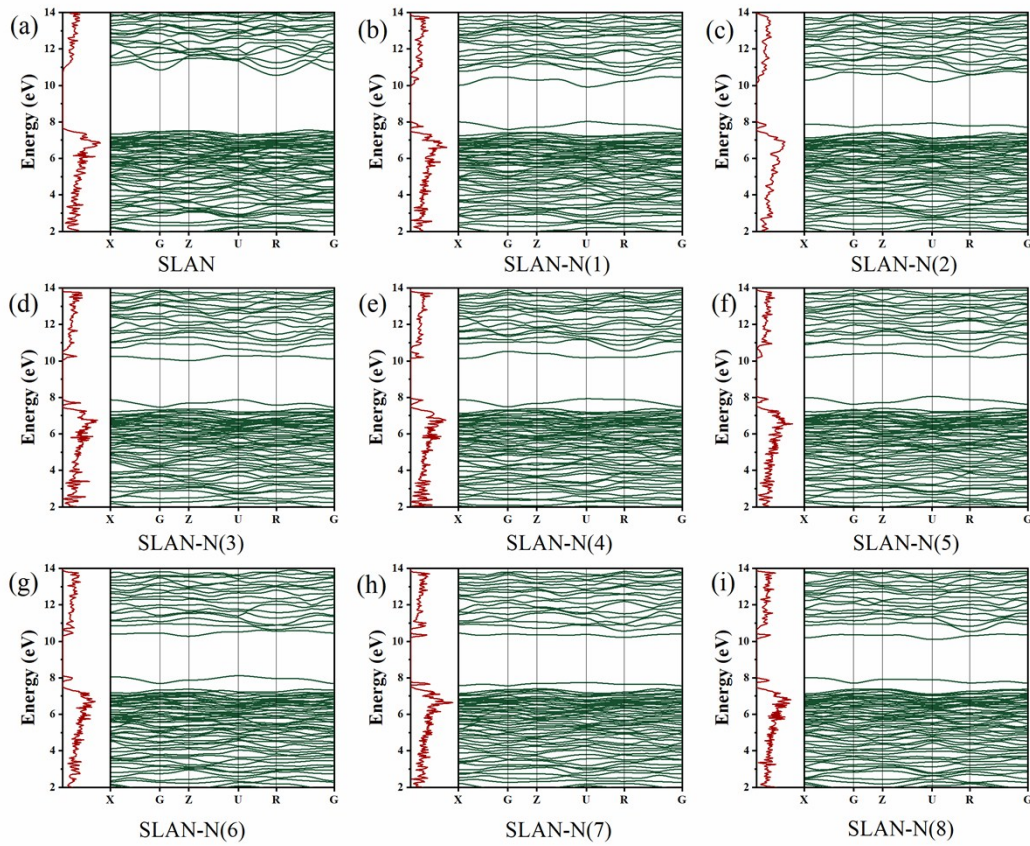

**Fig. S1.** DOS and computed electronic band dispersion of (a) the perfect compound SLAN and (b) SLAN with  $V_{N(1)}$  (c)  $V_{N(2)}$  (d)  $V_{N(3)}$  (e)  $V_{N(4)}$  (f)  $V_{N(5)}$  (g)  $V_{N(6)}$  (h)  $V_{N(7)}$  (i)  $V_{N(8)}$

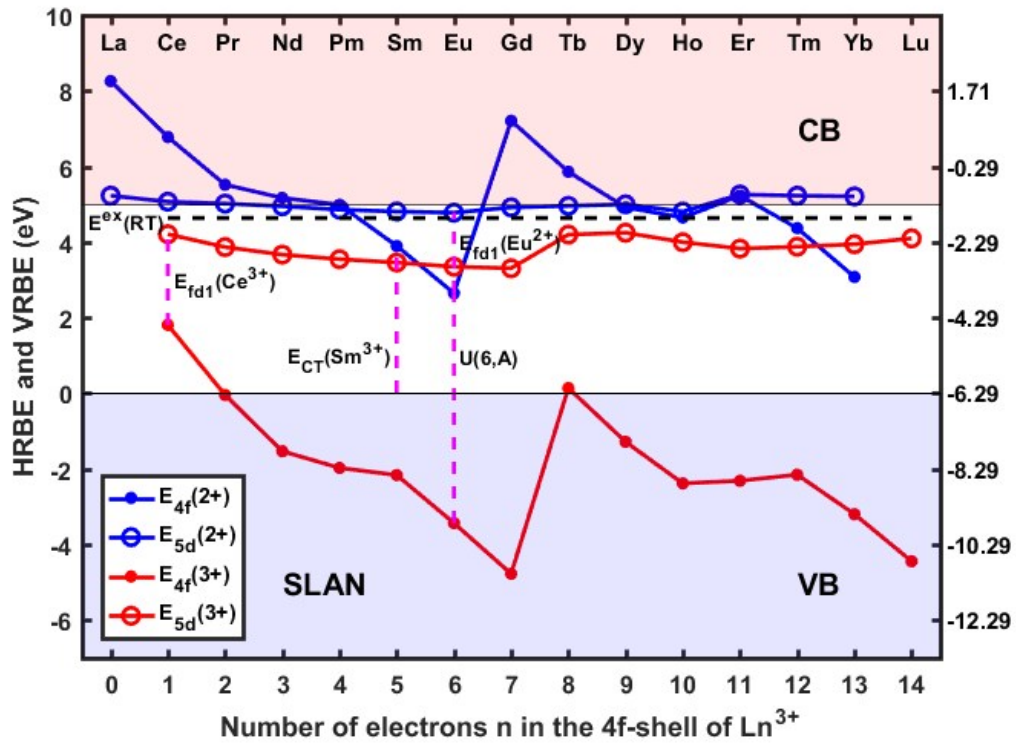

**Fig. S2.** HRBE and VRBE diagram of SLAN

**Table S3.** Parameter value that determine the HRBE schemes of SLAN, including the energy for electrons in the 4f-ground state of divalent  $E_{4f}(\text{Ln}^{2+})$  and trivalent  $E_{4f}(\text{Ln}^{3+})$ , the energy for the lowest 5d state of divalent  $E_{5d}(\text{Ln}^{2+})$  and trivalent  $E_{5d}(\text{Ln}^{3+})$  lanthanides and the band gap between the top of valence band and the bottom of conduction band ( $E_{VC}$ ).

| Ln | n  | $E_{4f}(\text{Ln}^{2+})/\text{eV}$ | $E_{4f}(\text{Ln}^{3+})/\text{eV}$ | $E_{5d}(\text{Ln}^{2+})/\text{eV}$ | $E_{5d}(\text{Ln}^{3+})/\text{eV}$ |
|----|----|------------------------------------|------------------------------------|------------------------------------|------------------------------------|
| La | 0  | 8.26                               |                                    | 5.23                               |                                    |
| Ce | 1  | 6.78                               | 1.81                               | 5.07                               | 4.21                               |
| Pr | 2  | 5.52                               | -0.04                              | 5.02                               | 3.87                               |
| Nd | 3  | 5.17                               | -1.53                              | 4.95                               | 3.67                               |
| Pm | 4  | 4.99                               | -1.97                              | 4.86                               | 3.55                               |
| Sm | 5  | 3.90                               | -2.16                              | 4.81                               | 3.46                               |
| Eu | 6  | 2.65                               | -3.43                              | 4.78                               | 3.35                               |
| Gd | 7  | 7.21                               | -4.77                              | 4.92                               | 3.31                               |
| Tb | 8  | 5.86                               | 0.14                               | 4.96                               | 4.20                               |
| Dy | 9  | 4.92                               | -1.28                              | 5.00                               | 4.25                               |
| Ho | 10 | 4.65                               | -2.38                              | 4.81                               | 4.00                               |
| Er | 11 | 5.23                               | -2.31                              | 5.26                               | 3.83                               |
| Tm | 12 | 4.37                               | -2.15                              | 5.23                               | 3.88                               |

|    |    |      |       |      |      |
|----|----|------|-------|------|------|
| Yb | 13 | 3.08 | -3.19 | 5.21 | 3.95 |
| Lu | 14 |      | -4.44 |      | 4.10 |

---

$E_{VC} = 4.96 \text{ eV}$
